# Supplementary material
Source: publisher site journal article supplement (http://www.kjim.org/upload/media/kjim-2020-510-suppl1.pdf)
Supplement: Supplementary file 1 [file kjim-2020-510-suppl1.pdf]

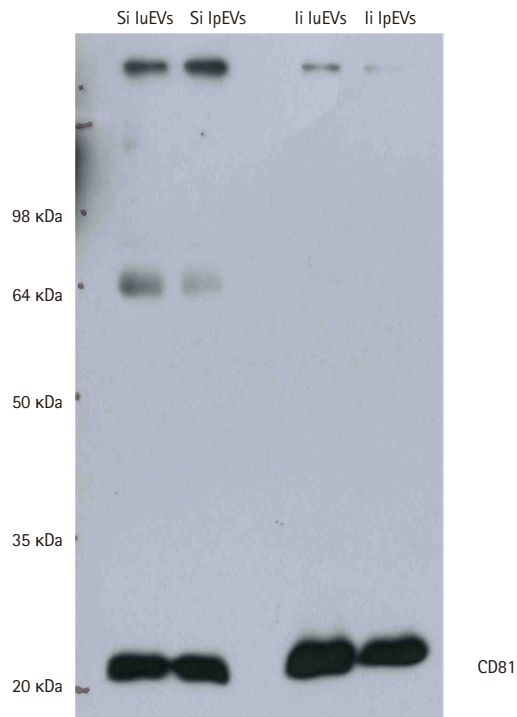

**Supplementary Figure 1.** Full length Western blotting assessment of the host cell marker protein CD81 within nanoparticles from the small intestine lumen (si luEVs), small intestine lamina propria (si lpEVs), large intestine lumen (li luEVs), and large intestine lamina propria (li lpEVs). The blot was scanned using a Samsung SCX-4623 device.
